# Supplementary material for: Comparative Analysis of Secondary Organic Aerosol Formation during PM2.5 Pollution and Complex Pollution of PM2.5 and O3 in Chengdu, China
Source: MDPI journal article supplement (doi:10.3390/atmos13111834), 2022-11-04
Supplement: s1 [file s1]

## Supplementary Materials

# Comparative Analysis of Secondary Organic Aerosol Formation during PM<sub>2.5</sub> Pollution and Complex Pollution of PM<sub>2.5</sub> and O<sub>3</sub> in Chengdu, China

Tianli Song <sup>1</sup>, Miao Feng <sup>2</sup>, Danlin Song <sup>2</sup>, Song Liu <sup>1</sup>, Qinwen Tan <sup>2</sup>, Yuancheng Wang <sup>2</sup>, Yina Luo <sup>2</sup>, Xi Chen <sup>2,\*</sup> and Fumo Yang <sup>1</sup>

<sup>1</sup> College of Architecture and Environment, Sichuan University, Chengdu, 610065, China

<sup>2</sup> Chengdu Research Academy of Environmental Sciences, Chengdu 610072, China

\* Correspondence: chenx@cdaes.org.cn

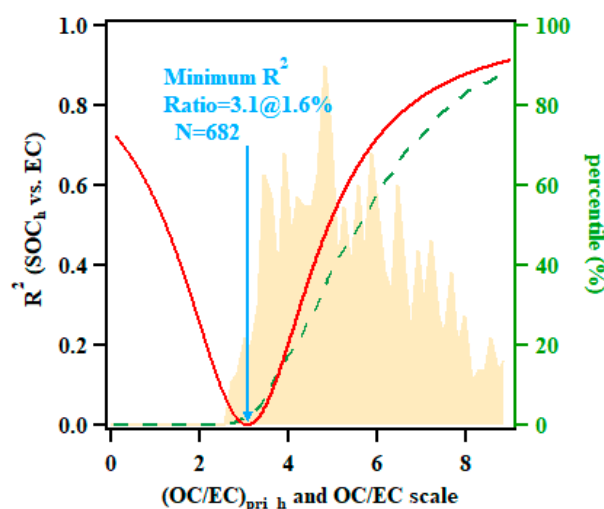

**Figure S1.** Illustration of the use of the minimum  $R^2$  method (MRS) to obtain  $(OC/EC)_{pri}$ . The red curve indicates the correlation coefficient ( $R^2$ ) between SOC and EC as a function of the assumed  $(OC/EC)_{pri}$ . The shaded area shows the frequency distribution of the OC/EC ratio. The green dashed curve represents the cumulative frequency of the OC/EC ratio.

**Table S1.** SOA yields of VOC photochemical reaction in this study.

| Species                | Yield <sup>1</sup> | Yield <sub>corr</sub> <sup>2</sup> | Species          | Yield <sup>1</sup> | Yield <sub>corr</sub> <sup>2</sup> |
|------------------------|--------------------|------------------------------------|------------------|--------------------|------------------------------------|
| Alkanes                |                    |                                    | Aromatics        |                    |                                    |
| 2,4-dimethylpentane    | 0.009              | 0.010                              | benzene          | 0.163              | 0.204                              |
| 2,3-dimethylpentane    | 0.009              | 0.010                              | toluene          | 0.092              | 0.386                              |
| 3-methylhexane         | 0.009              | 0.010                              | ethylbenzene     | 0.053              | 0.064                              |
| 2,2,4-trimethylpentane | 0.041              | 0.048                              | m/p-xylene       | 0.053              | 0.064                              |
| n-heptane              | 0.009              | 0.010                              | styrene          | 0.053              | 0.064                              |
| 2,3,4-trimethylpentane | 0.041              | 0.048                              | o-xylene         | 0.053              | 0.064                              |
| methylcyclohexane      | 0.121              | 0.140                              | isopropylbenzene | 0.053              | 0.064                              |
| 2-methylheptane        | 0.041              | 0.048                              | n-propylbenzene  | 0.053              | 0.064                              |
| 3-methylheptane        | 0.041              | 0.048                              | m-ethyltoluene   | 0.053              | 0.064                              |
| n-octane               | 0.041              | 0.048                              | p-ethyltoluene   | 0.053              | 0.064                              |

|                    |       |       |                        |       |       |
|--------------------|-------|-------|------------------------|-------|-------|
| n-nonane           | 0.080 | 0.093 | 1,3,5-trimethylbenzene | 0.053 | 0.064 |
| n-decane           | 0.146 | 0.169 | o-ethyltoluene         | 0.053 | 0.064 |
| n-undecane         | 0.270 | 0.313 | 1,2,4-trimethylbenzene | 0.053 | 0.064 |
| n-dodecane         | 0.348 | 0.404 | 1,2,3-trimethylbenzene | 0.053 | 0.064 |
| methylcyclopentane | 0.040 | 0.046 | m-diethylbenzene       | 0.053 | 0.064 |
| cyclohexane        | 0.040 | 0.046 | p-diethylbenzene       | 0.053 | 0.064 |
| 2-methylhexane     | 0.009 | 0.010 |                        |       |       |

<sup>1</sup>Yields are from Lim and Ziemann [1], Ng et al. [2] and Wang et al. [3].

<sup>2</sup>Yields were corrected by vapor loss biases ( $R_{wall}$ ) from Zhang et al. [4]. The  $R_{wall}$  was 1.16 for all alkanes and 4.2 for toluene adopts 4.2, where the  $R_{wall}$  for toluene was lower than that of Wang et al. [3].

## References

References must be numbered in order of appearance in the text (including citations in tables and legends) and listed individually at the end of the manuscript. We recommend preparing the references with a bibliography software package, such as EndNote, ReferenceManager or Zotero to avoid typing mistakes and duplicated references. Include the digital object identifier (DOI) for all references where available.

Citations and references in the Supplementary Materials are permitted provided that they also appear in the reference list here.

In the text, reference numbers should be placed in square brackets [ ] and placed before the punctuation; for example [1], [1–3] or [1,3]. For embedded citations in the text with pagination, use both parentheses and brackets to indicate the reference number and page numbers; for example [5] (p. 10), or [6] (pp. 101–105).

1. Lim, Y. B.; Ziemann, P. J., Effects of Molecular Structure on Aerosol Yields from OH Radical-Initiated Reactions of Linear, Branched, and Cyclic Alkanes in the Presence of NOx. *Environ. Sci. Technol.* **2009**, *43*, (7), 2328–2334. <https://doi.org/10.1021/es803389s>.
2. Ng, N. L.; Kroll, J. H.; Chan, A. W. H.; Chhabra, P. S.; Flagan, R. C.; Seinfeld, J. H., Secondary organic aerosol formation from m-xylene, toluene, and benzene. *Atmos. Chem. Phys.* **2007**, *7*, (14), 3909–3922. <https://doi.org/10.5194/acp-7-3909-2007>.
3. Wang, H.; Wang, Q.; Gao, Y.; Zhou, M.; Jing, S.; Qiao, L.; Yuan, B.; Huang, D.; Huang, C.; Lou, S.; Yan, R.; Gouw, J. A.; Zhang, X.; Chen, J.; Chen, C.; Tao, S.; An, J.; Li, Y., Estimation of Secondary Organic Aerosol Formation During a Photochemical Smog Episode in Shanghai, China. *J. Geophys. Res.: Atmos.* **2020**, *125*, (7). <https://doi.org/10.1029/2019jd032033>.
4. Zhang, X.; Cappa, C. D.; Jathar, S. H.; McVay, R. C.; Ensberg, J. J.; Kleeman, M. J.; Seinfeld, J. H., Influence of vapor wall loss in laboratory chambers on yields of secondary organic aerosol. *Proceedings of the National Academy of Sciences* **2014**, *111*, (16), 5802–5807. <https://doi.org/doi:10.1073/pnas.1404727111>.
